# Supplementary material
Source: PubMed Central journal article supplement (PMC7042823)
Supplement: jamadermatol-156-441-s001.pdf [file jamadermatol-156-441-s001.pdf]

## Supplementary Online Content

Singer S, Tkachenko E, Hartman RI, Mostaghimi A. Association between sexual orientation and lifetime prevalence of skin cancer in the United States. *JAMA Dermatol*. Published online February 12, 2020. doi:10.1001/jamadermatol.2019.4196

**eTable 1.** Univariate Odds Ratios for Lifetime Diagnosis of Skin Cancer Among Men

**eTable 2.** Univariate Odds Ratios for Lifetime Diagnosis of Skin Cancer Among Women

This supplementary material has been provided by the authors to give readers additional information about their work.

**eTable 1: Univariate Odds Ratios for Lifetime Diagnosis of Skin Cancer Among Men**

|                          | <b>Skin Cancer Prevalence<br/>% (95% CI)</b> | <b>OR (95% CI)</b>     | <b>p-value</b> |
|--------------------------|----------------------------------------------|------------------------|----------------|
| <b>Region</b>            |                                              |                        |                |
| Northeast                | 5.80 (5.57, 6.04)                            | <i>1.0 [reference]</i> | -              |
| South                    | 7.76 (7.48, 8.04)                            | 1.37 (1.28, 1.45)      | <.001          |
| Midwest                  | 6.19 (6.01, 6.38)                            | 1.07 (1.02, 1.13)      | 0.01           |
| West                     | 5.93 (5.55, 6.32)                            | 1.02 (0.94, 1.11)      | 0.57           |
| <b>Race/Ethnicity</b>    |                                              |                        |                |
| Non-Hispanic White       | 9.65 (9.44, 9.85)                            | <i>1.0 [reference]</i> | -              |
| Non-Hispanic Black       | 0.52 (0.33, 0.7)                             | 0.05 (0.03, 0.07)      | <.001          |
| Hispanic                 | 1.76 (1.45, 2.07)                            | 0.17 (0.14, 0.20)      | <.001          |
| Other                    | 1.09 (0.81, 1.37)                            | 0.10 (0.08, 0.13)      | <.001          |
| <b>Education Level</b>   |                                              |                        |                |
| High school or less      | 5.28 (5.05, 5.50)                            | <i>1.0 [reference]</i> | -              |
| Some college or more     | 7.74 (7.54, 7.94)                            | 1.51 (1.42, 1.59)      | <.001          |
| <b>Employment Status</b> |                                              |                        |                |
| Unemployed               | 3.73 (3.59, 3.87)                            | <i>1.0 [reference]</i> | -              |
| Employed                 | 12.0 (11.7, 12.4)                            | 3.53 (3.36, 3.71)      | <.001          |
| <b>Insurance Status</b>  |                                              |                        |                |
| Yes                      | 7.41 (7.24, 7.57)                            | <i>1.0 [reference]</i> | -              |
| No                       | 1.54 (1.29, 1.80)                            | 0.20 (0.17, 0.23)      | <.001          |
| <b>Smoking History</b>   |                                              |                        |                |
| Never Smoker             | 5.46 (5.28, 5.64)                            | <i>1.0 [reference]</i> | -              |
| Former Smoker            | 10.6 (10.2, 10.9)                            | 2.05 (1.95, 2.16)      | <.001          |
| Current Smoker           | 4.05 (3.73, 4.38)                            | 0.73 (0.67, 0.80)      | <.001          |
| <b>Alcohol Use</b>       |                                              |                        |                |
| Non-drinker              | 6.94 (6.70, 7.17)                            | <i>1.0 [reference]</i> | -              |

|                               |                   |                        |       |
|-------------------------------|-------------------|------------------------|-------|
| Light Drinker                 | 6.48 (6.25, 6.71) | 0.93 (0.88, 0.98)      | .007  |
| Moderate/Heavy Drinker        | 6.55 (6.17, 6.93) | 0.94 (0.88, 1.01)      | .091  |
| <b>Other Cancer Diagnosis</b> |                   |                        |       |
| No                            | 5.59 (5.45, 5.73) | <i>1.0 [reference]</i> | -     |
| Yes                           | 24.7 (23.7, 25.8) | 5.55 (5.21, 5.92)      | <.001 |

**eTable 2: Univariate Odds Ratios for Lifetime Diagnosis of Skin Cancer Among Women**

|                          | <b>Skin Cancer Prevalence<br/>% (95% CI)</b> | <b>OR (95% CI)</b>     | <b>p-value</b> |
|--------------------------|----------------------------------------------|------------------------|----------------|
| <b>Region</b>            |                                              |                        |                |
| Northeast                | 5.74 (5.52, 5.96)                            | <i>1.0 [reference]</i> | -              |
| South                    | 7.03 (6.79, 7.28)                            | 1.24 (1.18, 1.31)      | <.001          |
| Midwest                  | 5.93 (5.76, 6.10)                            | 1.04 (0.98, 1.09)      | 0.184          |
| West                     | 6.38 (5.96, 6.80)                            | 1.12 (1.03, 1.21)      | 0.007          |
| <b>Race/Ethnicity</b>    |                                              |                        |                |
| Non-Hispanic White       | 9.39 (9.19, 9.60)                            | <i>1.0 [reference]</i> | -              |
| Non-Hispanic Black       | 0.36 (0.28, 0.44)                            | 0.35 (0.03, 0.04)      | <.001          |
| Hispanic                 | 1.54 (1.27, 1.82)                            | 0.15 (0.13, 0.18)      | <.001          |
| Other                    | 0.96 (0.75, 1.17)                            | 0.09 (0.08, 0.12)      | <.001          |
| <b>Education Level</b>   |                                              |                        |                |
| High school or less      | 5.55 (5.34, 5.77)                            | <i>1.0 [reference]</i> | -              |
| Some college or more     | 7.00 (6.81, 7.19)                            | 1.28 (1.22, 1.35)      | <.001          |
| <b>Employment Status</b> |                                              |                        |                |
| Unemployed               | 4.13 (3.95, 4.30)                            | <i>1.0 [reference]</i> | -              |
| Employed                 | 8.75 (8.52, 8.97)                            | 2.23 (2.11, 2.35)      | <.001          |
| <b>Insurance Status</b>  |                                              |                        |                |
| Yes                      | 6.92 (6.77, 7.08)                            | <i>1.0 [reference]</i> | -              |
| No                       | 1.93 (1.65, 2.22)                            | 0.27 (0.23, 0.31)      | <.001          |
| <b>Smoking History</b>   |                                              |                        |                |
| Never Smoker             | 5.61 (5.45, 5.78)                            | <i>1.0 [reference]</i> | -              |
| Former Smoker            | 9.97 (9.59, 10.4)                            | 1.86 (1.77, 1.96)      | <.001          |
| Current Smoker           | 4.68 (4.37, 4.99)                            | 0.82 (0.76, 0.89)      | <.001          |
| <b>Alcohol Use</b>       |                                              |                        |                |
| Non-drinker              | 6.11 (5.92, 6.30)                            | <i>1.0 [reference]</i> | -              |

|                               |                   |                        |       |
|-------------------------------|-------------------|------------------------|-------|
| Light Drinker                 | 6.64 (6.42, 6.86) | 1.09 (1.04, 1.15)      | <.001 |
| Moderate/Heavy Drinker        | 7.93 (7.22, 8.63) | 1.32 (1.19, 1.47)      | <.001 |
| <b>Other Cancer Diagnosis</b> |                   |                        |       |
| No                            | 5.48 (5.34, 5.62) | <i>1.0 [reference]</i> | -     |
| Yes                           | 16.8 (16.0, 17.5) | 3.47 (3.27, 3.69)      | <.001 |
